# Supplementary material
Source: PubMed Central journal article supplement (PMC545897)
Supplement: mbc_E04-09-0782_1.pdf [file mbc_E04-09-0782_1.pdf]

**A**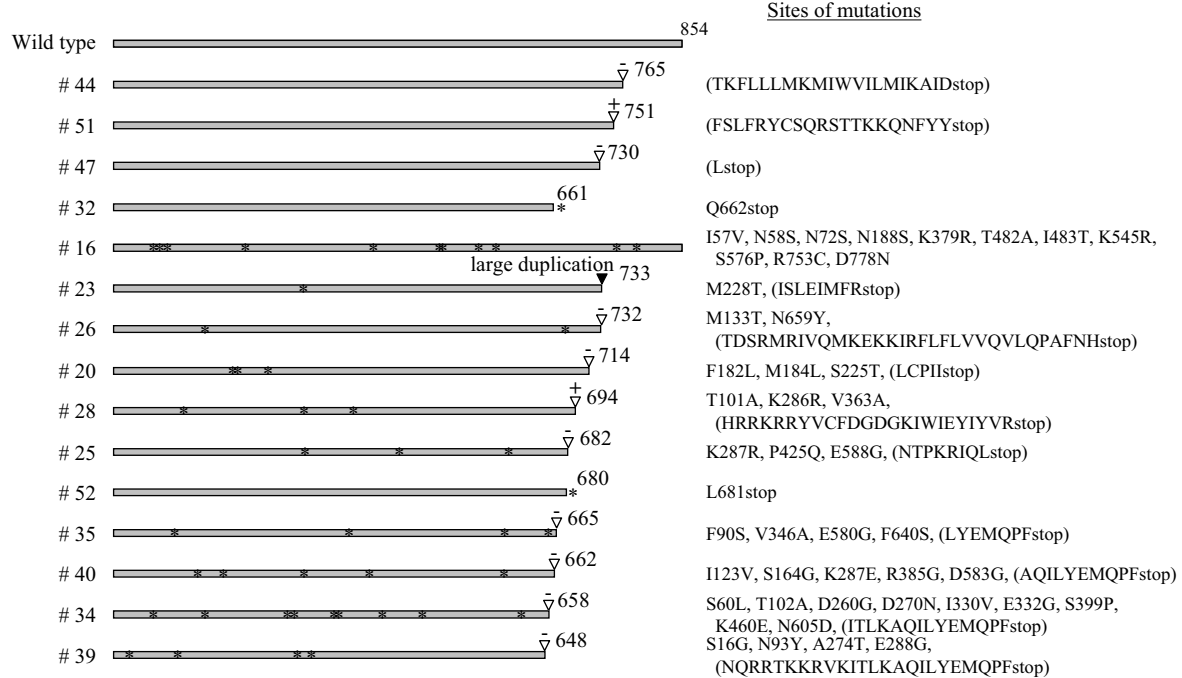**B**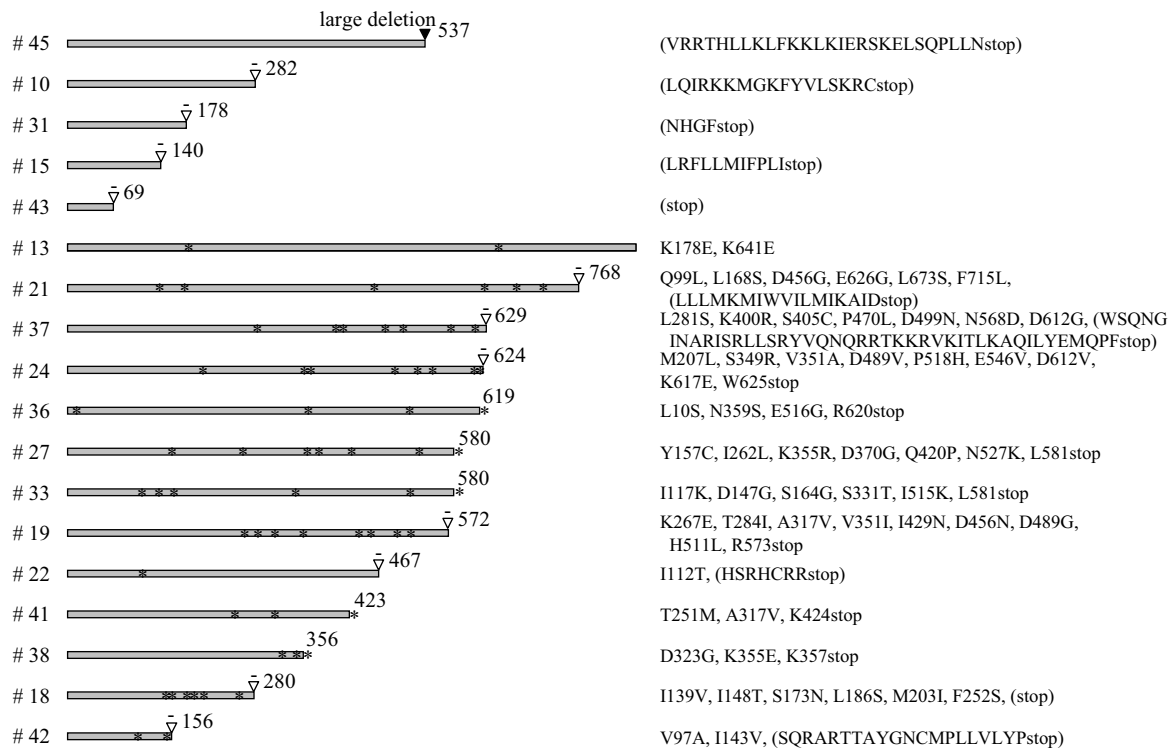

\* : missense or nonsense mutation, ∇ : frameshift mutation caused by 1 bp deletion  
 † : frameshift mutation caused by 1 bp insertion, ▼ : frameshift mutation caused by large deletion or duplication

**Supplementary Figure 1.** The mutation sites of 33 *xrs2* mutants that were isolated by primary screening for senescence phenotype in a *mecl1 smll1 hdf1* background. (A) Mutants that are resistant to MMS and HU. (B) Mutants that are sensitive to them. Numbers beside gray bars indicate amino acid residues just before nonsense or frameshift mutations. The positions of mutation sites are indicated at right side. Amino acids in parentheses indicate translated sequences following frameshift mutations.

## Supplementary Table 1

Sequences of primer DNA used for construction of the truncated *xrs2* mutants with tags

| Name   | Sequence (described 5' to 3')                                       | Mutant (Direction)                  |
|--------|---------------------------------------------------------------------|-------------------------------------|
| YTP881 | CAAAATATAATTTAATGAAATTGGAAATACTCGGAAAATTTATCAATCGATGAATTCGAGCTCG    | All $\Delta C$ (Reverse)            |
| YTP882 | GACGATGACGACGGTCCGAAGTTTACGTTCAAAAAGAAAGAAAAGGACGTACGCTGCAGGTCGAC   | $\Delta C0$ (Forward)               |
| YTP883 | TTTTCTCGTTGTTACAGGTACTGCAGCCAGCGTTCAACCACTAAAAAGTACGCTGCAGGTCGAC    | $\Delta C1$ (Forward)               |
| YTP884 | CCGTTAAAAAATACTCCAAAAAGGATACAACACTACAAAATGGGGCCGTACGCTGCAGGTCGAC    | $\Delta C2$ (Forward)               |
| YTP885 | CGTCCAAAATCAAAGGCGCACAAAGAAGAGGGTAAAAATAACACTCGTACGCTGCAGGTCGAC     | $\Delta C3$ (Forward)               |
| YTP886 | GGAAACAAAACAAGCAGAACAACTGAAAAATGGGAAAATAGCCTACGTACGCTGCAGGTCGAC     | $\Delta C4$ (Forward)               |
| YTP887 | TCATTTGATAGTGAGGAAAACAAAACAAGCAGAACAACTGAAAAAGTACGCTGCAGGTCGAC      | $\Delta C5$ (Forward)               |
| YTP888 | ACTAAAAATAGAGAGGTCAAAAAGAGTTAAGTCAACCATTGTTGAACGTACGCTGCAGGTCGAC    | $\Delta C6$ (Forward)               |
| YTP889 | TTGCCGAGGTAGCAGGGATTGGCTCTCAAACCATATCTTCGAACCGTACGCTGCAGGTCGAC      | $\Delta C7$ (Forward)               |
| YTP890 | GATTTTTTGTCTGGAGGTTTGTAGTACTAAGACTCTATCAGAAAATCGTACGCTGCAGGTCGAC    | $\Delta C8$ (Forward)               |
| YTP891 | TATGTTGACAGCTTGAAGCATCAACAGAATACCTGATTTTGACACGTACGCTGCAGGTCGAC      | $\Delta C9$ (Forward)               |
| YTP892 | ACGTTCAATATAAATTTATTTGCATTTGACAACATTGATAGTTTACGTACGCTGCAGGTCGAC     | $\Delta C10$ (Forward)              |
| YTP893 | AGGCTGAATAATATCAGAGTGTTAACTACTATCAAAAAGTGAACCGTACGCTGCAGGTCGAC      | $\Delta C11$ (Forward)              |
| YTP894 | GATATGATTAGTAATCCGGAGTACAATGTTTTGATTTTGATCCACGTACGCTGCAGGTCGAC      | $\Delta C12$ (Forward)              |
| YTP895 | GAGCAACAATACTGAGAAGGTGATAACTATAAATTTATGTGGGTAAGGGAACAAAAGCTGGAGC    | All $\Delta N$ (Forward)            |
| YTP896 | TATAAAGCTAATAGAGCCATCTTCCAATGTATTCTGGTATCGTACCTGTAGGGCGAATTGGGTAC   | $\Delta N0$ (Reverse)               |
| YTP897 | ATTTTTAATTATCAGTGGGTTTTTACTTGATCTACCTATACTATACTGTAGGGCGAATTGGGTAC   | $\Delta N1$ (Reverse)               |
| YTP898 | GTGTTTCAGATCCGAACCTATTATTGATTTCCCATTTGAATGTGATCTGTAGGGCGAATTGGGTAC  | $\Delta N2$ (Reverse)               |
| YTP899 | CGAGGCATTAATAGTAAATGTTTCGCCAACTTTCATGAATTTTTCTGTAGGGCGAATTGGGTAC    | $\Delta N3$ (Reverse)               |
| YTP900 | ACCATATTCAGAAAGCATCGTCCTGAATTGTGTCAAATGAGGAGGCTGTAGGGCGAATTGGGTAC   | $\Delta N4$ (Reverse)               |
| YTP901 | GTTGTCCTCGCTCTTTGGGTAATCGCTAATCATCAGATTAGCGGGCTGTAGGGCGAATTGGGTAC   | $\Delta N5$ (Reverse)               |
| YTP902 | TGTGGGAAGAAGAGTATTACACAATCCATCAGAAACCGTGATTTCTGTAGGGCGAATTGGGTAC    | $\Delta N6$ (Reverse)               |
| YTP903 | CACTCTGATATTATTCAGCCTCATAAATTCGAAAGCAAAATATTCTGTAGGGCGAATTGGGTAC    | $\Delta N7$ (Reverse)               |
| YTP904 | TGCAATAAATTTATATTGAACGTCCGCAGGAGAGATGATAGACGCTGTAGGGCGAATTGGGTAC    | $\Delta N8$ (Reverse)               |
| YTP905 | AATCAGGTATTCTGTTGATGCTTCCAAGCTGTCAACATATTATACTGTAGGGCGAATTGGGTAC    | $\Delta N9$ (Reverse)               |
| YTP906 | TTTGATAGTACATAGAATTTCCCATTTCTTTCTTATCTGTAGTCTGTAGGGCGAATTGGGTAC     | $\Delta N10$ (Reverse)              |
| YTP916 | CATTCCTCAGAAATTTGATCAAATTTACCGTTATCTAGAGTTCTCTGTAGGGCGAATTGGGTAC    | $\Delta N11$ (Reverse)              |
| YTP917 | CAAACTCCAGCAAAAAAATCAAGACTATCGAGTGGTAGTACTCTCTGTAGGGCGAATTGGGTAC    | $\Delta N12$ (Reverse)              |
| YTP918 | TGATTCTGCGCCACAATTAAGTCTCTTAGCGTCAGTTAAAGACCTCTGTAGGGCGAATTGGGTAC   | $\Delta N13$ (Reverse)              |
| YTP919 | AGCACCAGGGCTACTGTGACCACTTTTCTTTCCAATATCTTCAGTCTGTAGGGCGAATTGGGTAC   | $\Delta N14$ (Reverse)              |
| YTP920 | AGATATGTTTGTAGAGCCAATCCCTGCTACCTCCGCAATGACGGCTGTAGGGCGAATTGGGTAC    | $\Delta N15$ (Reverse)              |
| YTP921 | AGCATCATCCATCGAATTCACAGCAGCTGTTTCATAGTCAGCGGACTGTAGGGCGAATTGGGTAC   | $\Delta N16$ (Reverse)              |
| YTP922 | TGAAATTTCTCGTGAATAATTAGAAAGTTTACGGATGTTTTAGACTGTAGGGCGAATTGGGTAC    | $\Delta N17$ (Reverse)              |
| YTP923 | TTTTAGCTGATTAATAGCTTCCTCGCTCAACTCCTCATCCTTCAACTGTAGGGCGAATTGGGTAC   | $\Delta N18$ (Reverse)              |
| YTP924 | ATTCTTGCCTTTATGCCATTCTGGCTCCATTAGGCTATTTCCACCTGTAGGGCGAATTGGGTAC    | $\Delta N19$ (Reverse)              |
| YTP925 | GACAAAAGTCTTGAAATTTCTGCGTTTATGCCATTCTGGCTCCATCTGTAGGGCGAATTGGGTAC   | $\Delta N20$ (Reverse)              |
| YTP926 | TCTAGTGATTA AAAAGGCTGCATTTCTGATAAAAATCTGAGCTTTGCTGTAGGGCGAATTGGGTAC | $\Delta N21$ , $\Delta M$ (Reverse) |
| YTP938 | GGAAACAAAACAAGCAGAACAACTGAAAAATGGGAAAATAGCCTAAGGGAACAAAAGCTGGAGC    | $\Delta M$ (Forward)                |

Sequences with underline are corresponding to vectors sequences.

## Supplementary Table 2

Sequences of primer DNA used in this study

| Name                        | Sequence (described 5' to 3')                                        | Gene ( <u>Underline</u> )                                         |
|-----------------------------|----------------------------------------------------------------------|-------------------------------------------------------------------|
| Primers for cloning         |                                                                      |                                                                   |
| YTP181                      | <u>GCGGATCC</u> AAATTGCGGTAGAATGGTGTC                                | 5'-UTR of <i>XRS2</i> ( <i>Bam</i> HI site tag)                   |
| YTP182                      | <u>GCGGATCC</u> TTTCACTCTGCCTGAGGATG                                 | 3'-UTR of <i>XRS2</i> ( <i>Bam</i> HI site tag)                   |
| YTP157                      | <u>ACGCGTCGAC</u> ATGGAAGCTGAAGTCAAGG                                | 5'-UTR of <i>HDF1</i> ( <i>Sal</i> I site tag)                    |
| YTP158                      | <u>TCAGGTCGAC</u> GTGCAGATGACGAAGAAGGC                               | 3'-UTR of <i>HDF1</i> ( <i>Sal</i> I site tag)                    |
| YTP907                      | <u>ACCGCTCGAG</u> TTGATGAAAGAACCAAGGCTG                              | Inside of <i>MET17</i> ORF ( <i>Xho</i> I site tag)               |
| YTP908                      | <u>AGCGCTCGAG</u> CACCGTGTCTTTCAGCTCTC                               | Inside of <i>MET17</i> ORF ( <i>Xho</i> I site tag)               |
| XRS-N                       | <u>CCGTCGAC</u> TGTGGGTAGTACGATACCAG                                 | N-terminus of <i>XRS2</i> ( <i>Sal</i> I site tag)                |
| XRS-C                       | <u>GCGTCGAC</u> AAAACCGATCCGATACAGCTG                                | C-terminus of <i>XRS2</i> ( <i>Sal</i> I site tag)                |
| MRE-N                       | <u>CCGGATCC</u> TGGACTATCCTGATCCAGAC                                 | N-terminus of <i>MRE11</i> ( <i>Bam</i> HI site tag)              |
| MRE-C                       | <u>CGCTGCAGG</u> TTGTTCCGGAAGGCAAGC                                  | C-terminus of <i>MRE11</i> ( <i>Pst</i> I site tag)               |
| YTP949                      | <u>TCGGAATTC</u> ATGGAGCCAGAATGGCATAAACG                             | Inside of <i>xrs2-E1</i> and <i>-E3</i> ( <i>Eco</i> RI site tag) |
| YTP947                      | <u>TGCGAATTC</u> GCTATTCATCCAGCAGGCC                                 | 3'-UTR of <i>xrs2-E1</i> to <i>-E4</i> ( <i>Eco</i> RI site tag)  |
| YTP948                      | <u>TCGGAATTC</u> TTGAAGGATGAGGAGTTGAGC                               | Inside of <i>xrs2-E2</i> and <i>-E4</i> ( <i>Eco</i> RI site tag) |
| Primers for gene disruption |                                                                      |                                                                   |
| YTP909                      | GTAATAGATGAGCAACAATACTGAGAAGGTGATAACTATAAATTTAGATTGTACTGAGAGTGACAC   | <i>xrs2Δ</i> (pRS vector)                                         |
| YTP915                      | CAAAATATAATTTAATGAAATTGGAAATACTCGGAAAATTTATCACTGTGCGGTATTTACACCCG    | <i>xrs2Δ</i> (pRS vector)                                         |
| YTP115                      | CTATTCCTGATTCGGCATATCAGGTAATCATGATGATGCGTCGGAGATTGTACTGAGAGTGACAC    | <i>mre11Δ</i> (pRS vector)                                        |
| YTP116                      | TCGTTGCAGTTCGCACTCGTTTGGGTTTGCTCGTTGGCTTACTGCCTGTGCGGTATTTACACCCG    | <i>mre11Δ</i> (pRS vector)                                        |
| YTP119                      | ATCTTGGAAATACGTGATATTTCTGTCACCAAGAAGACAGCCTGTGGAGATTGTACTGAGAGTGACAC | <i>rad50Δ</i> (pRS vector)                                        |
| YTP120                      | TTCTTCATCTAAATTGGTGGTAGGTTCTGCTAGTGCAATTACGCCCTGTGCGGTATTTACACCCG    | <i>rad50Δ</i> (pRS vector)                                        |
